# Supplementary material for: Mutants of GABA Transaminase (POP2) Suppress the Severe Phenotype of succinic semialdehyde dehydrogenase (ssadh) Mutants in Arabidopsis
Source: PubMed Central journal article supplement (PMC2557145; doi:10.1371/journal.pone.0003383), 2008-10-10

Figure S1

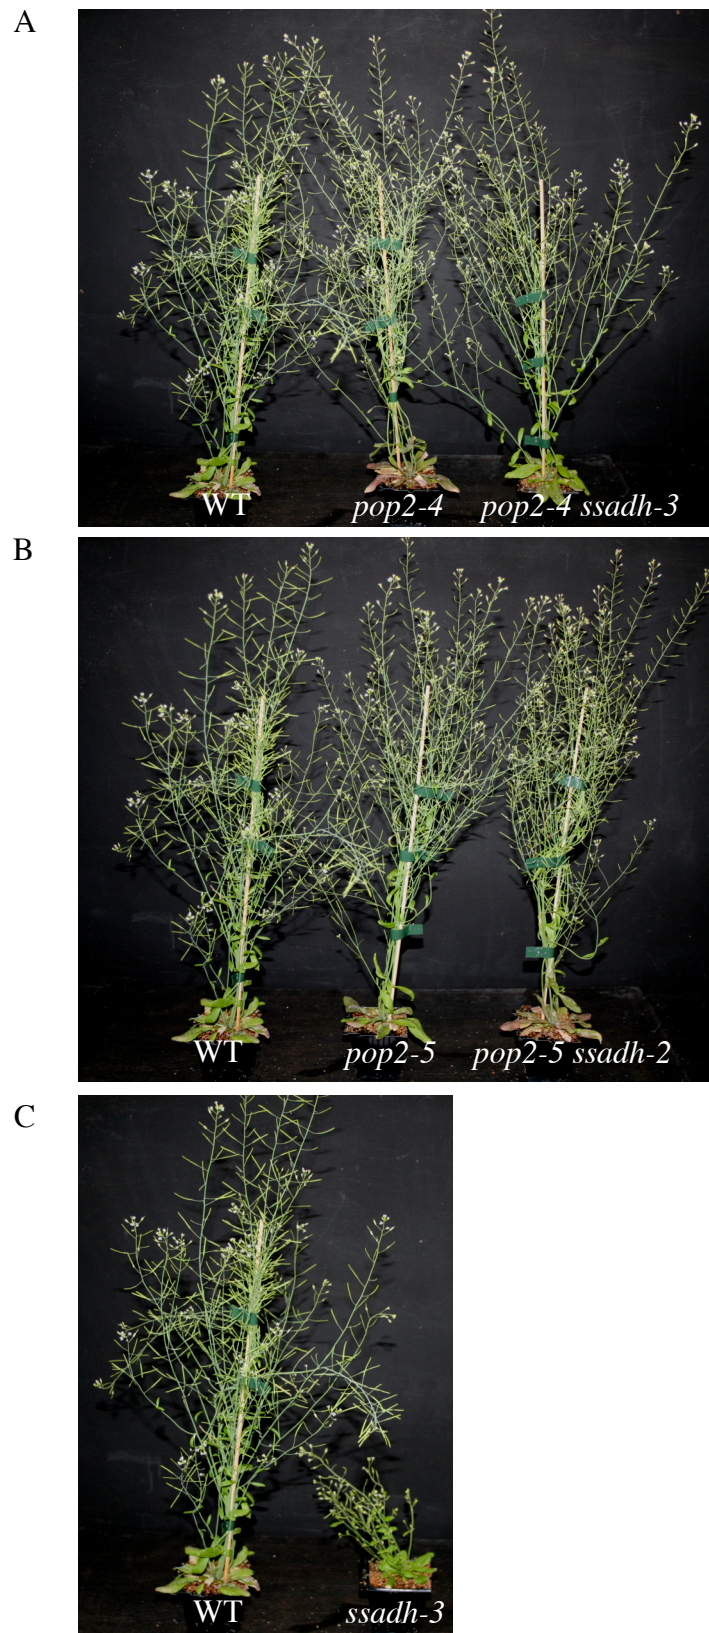

Supplement: pone.0003383.s001.pdf [file pone.0003383.s001.pdf]
